# Supplementary material
Source: ML conference proceedings conference paper supplement (https://proceedings.neurips.cc/paper_files/paper/2012/hash/0f96613235062963ccde717b18f97592-Abstract.html)

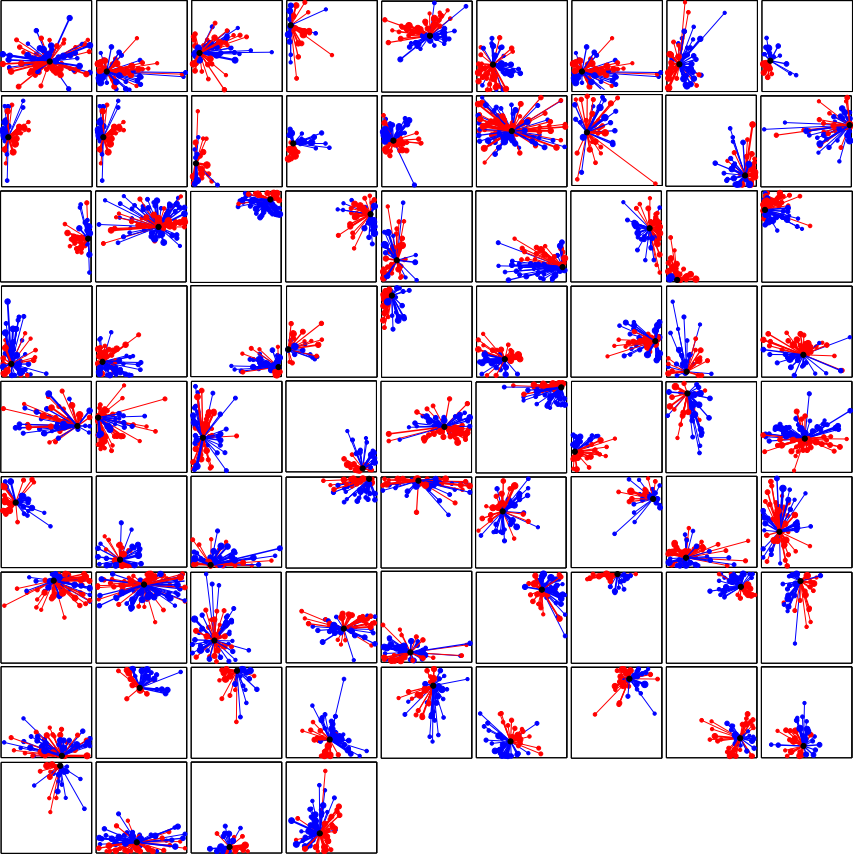

Supplement: Supplementary file 1 [file 0f96613235062963ccde717b18f97592-Supplemental.zip]
